# Supplementary material for: Polyvinylalcohol-carbazate (PVAC) reduces red blood cell hemolysis
Source: PLoS One. 2019 Dec 6;14(12):e0225777. doi: 10.1371/journal.pone.0225777 (PMC6897416; doi:10.1371/journal.pone.0225777)
Supplement: S2 File — (XLSX) [file pone.0225777.s008.xlsx]

## Sheet: Fig 2. 
A						B
Control	2.5 mg/ml	0.5 mg/ml	0.1 mg/ml	0.01 mg/ml		Days	Control				2.5 mg/ml				0.5 mg/ml				0.1 mg/ml				0.01 mg/ml
1.11111	0.954545	0.999011	1.17284	1.11111		0	0.363636	0.363636	0.274725	0.274725	0.409091	0.363636	0.21978	0.274725	0.363636	0.318182	0.32967	0.274725	0.318182	0.363636	0.274725	0.274725	0.363636	0.318182	0.274725	0.274725
1	0.772727	0.954545	0.954545	1		2	0.454545	0.454545	0.384615	0.32967	0.454545	0.454545	0.384615	0.32967	0.5	0.5	0.384615	0.384615	0.454545	0.5	0.43956	0.384615	0.5	0.454545	0.384615	0.384615
1	0.818182	0.909091	0.909091	1		7 prior to new dose	0.818182	0.636364	0.549451	0.43956	0.681818	0.590909	0.494505	0.43956	0.681818	0.636364	0.494505	0.494505	0.636364	0.636364	0.549451	0.494505	0.727273	0.590909	0.43956	0.494505
1.0989	0.824176	0.934066	0.989011	1.04396		7 after new dose	0.818182	0.681818	0.604396	0.494505	0.681818	0.636364	0.494505	0.494505	0.681818	0.636364	0.549451	0.549451	0.636364	0.727273	0.549451	0.494505	0.681818	0.590909	0.43956	0.494505
0.934066	0.714286	0.714286	0.989011	1.15385		9	1.40909	1.5	0.934066	0.604396	1.09091	0.727273	0.604396	0.604396	0.954545	0.909091	0.879121	0.659341	0.954545	1	0.714286	0.659341	1.18182	1	0.879121	1.0989
1.35802	0.925926	0.987654	0.864198	1.04938		14	3.77273	4.54545	2.03297	1.75824	1.77273	1.63636	1.81319	1.75824	1.81818	1.72727	1.81319	2.08791	1.90909	1.72727	1.81319	2.03297	1.86364	1.72727	1.75824	3.24176

## Sheet: Fig 3. 
		A					B
	Hemolysis in % normalized to control						MFI
	2.5 mg/ml	0.5 mg/ml	0.1 mg/ml	Control			Hypotonic	Isotonic
	38.3	55.1	97.9	100			876	395
	31.1515	66.7879	72.2835	100			910	318
	35.4331	57.4803	86.6142	100			875	531
	42.0354	54.8673	92.9204	100			875	326
							933	288
	A at 540 nm not normalized						1692	255
	0.383	0.551	0.979	1			1176	231
	0.257	0.551	0.918	0.825			800
	0.45	0.73	1.1	1.27			645
	0.475	0.62	1.05	1.13			641
							626
							1090
							631
							906
							1513
							1868
							930
							1387

## Sheet: Fig 4.
	Normalized to control, free aldehydes
	Control	2.5 mg/ml	0.5 mg/ml	0.1 mg/ml	0.01 mg/ml
	100	42.9003	53.7764	65.861	92.4471
	100	54.9849	50.1511	78.5498	73.1118
	100	40.4834	52.568	70.6949	93.6556
	100	42.9003	39.8792	59.8187	135.347

## Sheet: Fig 5.
	Negative control	PVAC 2.5 mg/ml	Positive control
TCC	139.05	119.55	448.3
	157.16	231	475.4
	116.86	152.26	398.25
C3a	900	1090	1266
	649	497	3798
	785	975	1080
TAT	9235.5	5368.75	18190
	2573.4	2561.8	15235
	8657.5	5538	10093
TPC	24	36	1
	100	92	27
	74	55	22

## Sheet: Fig 6.
	A 540 nm
	Days	PVAC 2.5 mg/mL								PVAC 500 μg/mL								PVAC 100 μg/mL								PVAC 20 μg/mL								EC 2.5 mg/mL								EC 500 μg/mL
	0	0.043	0.045	0.044	0.045	0.045	0.045	0.044	0.044	0.043	0.044	0.046	0.044	0.045	0.048	0.044	0.045	0.045	0.048	0.046	0.046	0.049	0.047	0.046	0.046	0.045	0.047	0.049	0.041	0.041	0.045	0.051	0.045	0.048	0.046	0.047	0.042	0.041	0.045	0.045	0.043	0.045	0.046	0.041	0.047	0.045	0.044	0.044	0.044
	4	0.056	0.055	0.049	0.053	0.052	0.056	0.048	0.064	0.076	0.054	0.05	0.049	0.058	0.052	0.049	0.06	0.078	0.048	0.054	0.049	0.053	0.052	0.05	0.062	0.086	0.05	0.049	0.049	0.058	0.054	0.053	0.072	0.053	0.055	0.051	0.051	0.059	0.052	0.048	0.064	0.067	0.056	0.052	0.049	0.054	0.075	0.051	0.063
	7	0.068	0.065	0.056	0.063	0.065	0.07	0.061	0.05	0.066	0.063	0.052	0.052	0.057	0.059	0.049	0.047	0.066	0.065	0.06	0.053	0.064	0.063	0.057	0.049	0.068	0.061	0.054	0.055	0.063	0.061	0.052	0.051	0.087	0.088	0.064	0.066	0.072	0.089	0.061	0.056	0.087	0.074	0.069	0.065	0.078	0.067	0.055	0.059
	14	0.12	0.07	0.12	0.11	0.07	0.07	0.13	0.18	0.1	0.11	0.12	0.12	0.11	0.11	0.13	0.11	0.115	0.097	0.127	0.126	0.101	0.099	0.151	0.192	0.108	0.105	0.128	0.122	0.128	0.109	0.169	0.178	0.228	0.246	0.237	0.211	0.268	0.278	0.202	0.215	0.185	0.229	0.222	0.214	0.23	0.242	0.212	0.204
	21	0.26	0.14	0.12	0.12	0.11	0.15	0.18	0.15	0.11	0.2	0.16	0.16	0.15	0.16	0.17	0.08	0.212	0.169	0.156	0.157	0.152	0.163	0.128	0.184	0.222	0.16	0.183	0.182	0.131	0.148	0.13	0.155	0.63	0.74	0.77	0.751	0.879	0.929	0.661	0.79	0.487	0.648	0.548	0.563	0.626	0.633	0.638	0.583
	28	0.31	0.23	0.21	0.21	0.24	0.18	0.13	0.2	0.32	0.32	0.33	0.32	0.29	0.3	0.36	0.22	0.35	0.349	0.32	0.339	0.336	0.305	0.33	0.32	0.32	0.311	0.316	0.288	0.315	0.287	0.304	0.464	1.46	1.33	1.356	1.269	1.481	1.619	1.148	1.168	1.412	1.279	1.198	1.135	1.491	1.293	1.097	1.079
[truncated: 48 more columns]

## Sheet: S Fig 2. 
	Control	PVAC non-conjugated	0.2 %	1 %	5 %	10 %	20 %	100 %
	0	100	96.7096	93.7053	79.2561	44.9213	33.9056	4.72103
	0	100	95.5396	96.5468	72.8058	67.3381	31.5108	14.964
	0	100	104.204	106.879	98.4713	68.4076	75.5414	-7.64331

## Sheet: S Fig 3. 
	Beads	PVAC	Biotin-PVAC	PVAC + Beads	Biotin-PVAC + Beads
	0.002	0.351	0.318	0.001	0.127
	-0.001	0.337	0.361	0	0.112

## Sheet: S Fig 5.
	A						B
	Wavelength	Control	2.5 mg/ml	1 mg/ml	0.1 mg/ml		Control	2.5 mg/ml	1 mg/ml	0.1 mg/ml
	300	3.463	3.372	3.419	3.219		3.215	3.107	3.019	2.913
	310	3.145	3.042	3.085	2.918		2.891	2.798	2.714	2.621
	320	3.776	3.665	3.734	3.532		3.513	3.405	3.318	3.208
	330	4.1	4.1	4.1	4.1		4.025	3.942	3.877	3.804
	340	4.1	4.1	4.1	4.1		4.1	4.1	4.1	4.082
	350	4.1	4.1	4.1	4.1		4.1	4.1	4.1	4.1
	360	4.1	4.1	4.1	4.1		4.1	4.1	4.1	4.063
	370	4.1	4.1	4.1	4.1		4.1	4.1	4.1	4.089
	380	4.1	4.1	4.1	4.1		4.1	4.1	4.1	4.1
	390	4.1	4.1	4.1	4.1		4.1	4.1	4.1	4.1
	400	4.1	4.1	4.1	4.1		4.1	4.1	4.1	4.1
	410	4.1	4.1	4.1	4.1		4.1	4.1	4.1	4.1
	420	4.1	4.1	4.1	4.1		4.1	4.1	4.1	4.1
	430	4.1	4.1	4.1	4.1		4.1	4.1	4.1	4.1
	440	4.1	4.1	4.1	4.01		4.1	4.006	3.862	3.736
	450	2.824	2.727	2.772	2.613		2.596	2.492	2.427	2.343
	460	2.017	1.95	1.981	1.873		1.853	1.782	1.735	1.68
	470	1.583	1.533	1.557	1.48		1.454	1.402	1.366	1.327
	480	1.344	1.306	1.325	1.267		1.234	1.195	1.164	1.137
	490	1.215	1.185	1.201	1.155		1.116	1.084	1.056	1.037
	500	1.137	1.112	1.127	1.087		1.045	1.018	0.991	0.976
	510	1.082	1.058	1.073	1.035		0.994	0.968	0.943	0.929
	520	1.262	1.23	1.249	1.194		1.159	1.124	1.096	1.071
	530	2.013	1.949	1.983	1.869		1.852	1.782	1.739	1.677
	540	2.643	2.55	2.594	2.43		2.435	2.33	2.274	2.181
	550	2.063	1.989	2.022	1.901		1.897	1.815	1.771	1.701
	560	1.625	1.57	1.597	1.503		1.493	1.432	1.397	1.345
	570	2.317	2.235	2.275	2.13		2.133	2.044	1.997	1.911
	580	2.383	2.292	2.332	2.183		2.193	2.095	2.046	1.961
	590	0.741	0.718	0.727	0.698		0.676	0.653	0.638	0.623
	600	0.29	0.287	0.291	0.293		0.265	0.262	0.257	0.262
	610	0.207	0.207	0.209	0.218		0.189	0.19	0.187	0.196
	620	0.192	0.194	0.195	0.206		0.176	0.179	0.176	0.187
	630	0.182	0.184	0.186	0.198		0.168	0.171	0.168	0.18
	640	0.144	0.144	0.145	0.156		0.132	0.134	0.133	0.142
	650	0.098	0.096	0.097	0.106		0.09	0.09	0.09	0.097
	660	0.074	0.071	0.072	0.079		0.068	0.066	0.068	0.073
	670	0.065	0.061	0.062	0.068		0.059	0.057	0.059	0.063
	680	0.061	0.058	0.059	0.065		0.056	0.054	0.056	0.06
	690	0.06	0.056	0.058	0.063		0.055	0.053	0.056	0.059
	700	0.06	0.056	0.058	0.063		0.055	0.054	0.056	0.059
