# Supplementary material for: Polyvinylalcohol-carbazate (PVAC) reduces red blood cell hemolysis
Source: PLoS One. 2019 Dec 6;14(12):e0225777. doi: 10.1371/journal.pone.0225777 (PMC6897416; doi:10.1371/journal.pone.0225777)
Supplement: S3 File — (XLSX) [file pone.0225777.s009.xlsx]

## Sheet: Sheet1
Accession	Description	Score	Coverage	# Proteins	# Unique Peptides	# Peptides	# PSMs	# AAs	MW [kDa]	calc. pI
P11277	Spectrin beta chain, erythrocytic OS=Homo sapiens GN=SPTB PE=1 SV=5 - [SPTB1_HUMAN]	2438.31	67.62	1	132	138	721	2137	246.316	5.2749
P02549	Spectrin alpha chain, erythrocytic 1 OS=Homo sapiens GN=SPTA1 PE=1 SV=5 - [SPTA1_HUMAN]	2175.66	64.32	1	151	151	722	2419	279.842	5.04639
P16157	Ankyrin-1 OS=Homo sapiens GN=ANK1 PE=1 SV=3 - [ANK1_HUMAN]	1929.28	56.25	1	32	77	608	1881	206.137	6.01123
H0YBS0	Ankyrin-1 (Fragment) OS=Homo sapiens GN=ANK1 PE=1 SV=1 - [H0YBS0_HUMAN]	914.93	59.13	1	3	48	289	1040	115.801	5.77002
P04264	Keratin, type II cytoskeletal 1 OS=Homo sapiens GN=KRT1 PE=1 SV=6 - [K2C1_HUMAN]	515.449	46.58	1	34	38	171	644	65.999	8.11865
P11171	Protein 4.1 OS=Homo sapiens GN=EPB41 PE=1 SV=4 - [41_HUMAN]	419.971	42.94	1	30	30	150	864	96.9573	5.57959
P02730	Band 3 anion transport protein OS=Homo sapiens GN=SLC4A1 PE=1 SV=3 - [B3AT_HUMAN]	361.633	36.99	1	25	25	122	911	101.727	5.18604
P35612	Beta-adducin OS=Homo sapiens GN=ADD2 PE=1 SV=3 - [ADDB_HUMAN]	336.381	48.35	1	28	29	110	726	80.8034	5.92236
P13645	Keratin, type I cytoskeletal 10 OS=Homo sapiens GN=KRT10 PE=1 SV=6 - [K1C10_HUMAN]	272.775	50.68	1	22	25	95	584	58.7917	5.21143
P35908	Keratin, type II cytoskeletal 2 epidermal OS=Homo sapiens GN=KRT2 PE=1 SV=2 - [K22E_HUMAN]	268.556	64.16	1	28	36	102	639	65.3932	8.00146
P35611	Alpha-adducin OS=Homo sapiens GN=ADD1 PE=1 SV=2 - [ADDA_HUMAN]	226.106	41.38	1	22	23	74	737	80.9047	5.8335
P60709	Actin, cytoplasmic 1 OS=Homo sapiens GN=ACTB PE=1 SV=1 - [ACTB_HUMAN]	200.52	65.07	2	18	18	68	375	41.7097	5.47803
P16452	Erythrocyte membrane protein band 4.2 OS=Homo sapiens GN=EPB42 PE=1 SV=3 - [EPB42_HUMAN]	199.14	38.93	1	24	24	74	691	76.9607	8.08936
P35527	Keratin, type I cytoskeletal 9 OS=Homo sapiens GN=KRT9 PE=1 SV=3 - [K1C9_HUMAN]	170.689	46.71	1	19	20	49	623	62.0268	5.23682
P02768	Serum albumin OS=Homo sapiens GN=ALB PE=1 SV=2 - [ALBU_HUMAN]	142.87	53.04	1	28	28	79	609	69.3215	6.27783
Q08495	Dematin OS=Homo sapiens GN=DMTN PE=1 SV=3 - [DEMA_HUMAN]	124.697	44.94	1	15	15	51	405	45.4862	8.88037
P68871	Hemoglobin subunit beta OS=Homo sapiens GN=HBB PE=1 SV=2 - [HBB_HUMAN]	119.327	63.27	1	7	7	37	147	15.9883	7.28369
P11142	Heat shock cognate 71 kDa protein OS=Homo sapiens GN=HSPA8 PE=1 SV=1 - [HSP7C_HUMAN]	118.809	34.83	1	14	19	43	646	70.8542	5.51611
P13647	Keratin, type II cytoskeletal 5 OS=Homo sapiens GN=KRT5 PE=1 SV=3 - [K2C5_HUMAN]	110.012	28.47	1	11	22	49	590	62.34	7.73779
J3KN67	Tropomyosin alpha-3 chain OS=Homo sapiens GN=TPM3 PE=1 SV=1 - [J3KN67_HUMAN]	102.007	54.74	1	15	22	51	285	33.2018	4.76709
P02538	Keratin, type II cytoskeletal 6A OS=Homo sapiens GN=KRT6A PE=1 SV=3 - [K2C6A_HUMAN]	101.896	20.74	3	5	17	46	564	60.0083	8.00146
P28289	Tropomodulin-1 OS=Homo sapiens GN=TMOD1 PE=1 SV=1 - [TMOD1_HUMAN]	90.5995	51.81	1	14	14	36	359	40.5439	5.09717
Q01082	Spectrin beta chain, non-erythrocytic 1 OS=Homo sapiens GN=SPTBN1 PE=1 SV=2 - [SPTB2_HUMAN]	86.2673	4.19	1	3	9	36	2364	274.439	5.56689
B4DGX2	Phosphatidylinositol 5-phosphate 4-kinase type-2 alpha OS=Homo sapiens GN=PIP4K2A PE=1 SV=1 - [B4DGX2_HUMAN]	78.7481	32.28	2	13	13	32	347	39.777	6.21436
P08107	Heat shock 70 kDa protein 1A/1B OS=Homo sapiens GN=HSPA1A PE=1 SV=5 - [HSP71_HUMAN]	78.2225	39.47	1	16	20	30	641	70.009	5.65576
J3QLD9	Flotillin-2 OS=Homo sapiens GN=FLOT2 PE=1 SV=1 - [J3QLD9_HUMAN]	70.0967	39.02	3	14	14	29	428	47.1127	5.31299
H7BYY1	Tropomyosin 1 (Alpha), isoform CRA_m OS=Homo sapiens GN=TPM1 PE=1 SV=1 - [H7BYY1_HUMAN]	66.8505	49.19	1	9	16	34	248	28.7296	4.81787
P27105	Erythrocyte band 7 integral membrane protein OS=Homo sapiens GN=STOM PE=1 SV=3 - [STOM_HUMAN]	66.3395	47.57	1	10	10	26	288	31.7107	7.88428
Q00013	55 kDa erythrocyte membrane protein OS=Homo sapiens GN=MPP1 PE=1 SV=2 - [EM55_HUMAN]	55.9095	31.12	1	12	12	26	466	52.2636	7.37158
P02776	Platelet factor 4 OS=Homo sapiens GN=PF4 PE=1 SV=2 - [PLF4_HUMAN]	46.5717	27.72	1	4	4	12	101	10.8379	8.6167
O75955	Flotillin-1 OS=Homo sapiens GN=FLOT1 PE=1 SV=3 - [FLOT1_HUMAN]	42.9175	29.51	1	10	10	17	427	47.3256	7.48877
P05198	Eukaryotic translation initiation factor 2 subunit 1 OS=Homo sapiens GN=EIF2S1 PE=1 SV=3 - [IF2A_HUMAN]	40.8116	44.76	3	11	11	17	315	36.0894	5.08447
P41091	Eukaryotic translation initiation factor 2 subunit 3 OS=Homo sapiens GN=EIF2S3 PE=1 SV=3 - [IF2G_HUMAN]	40.3909	22.67	1	9	9	22	472	51.0772	8.39697
Q96PL5	Erythroid membrane-associated protein OS=Homo sapiens GN=ERMAP PE=1 SV=1 - [ERMAP_HUMAN]	38.011	25.47	1	11	11	17	475	52.5716	8.47021
P08779	Keratin, type I cytoskeletal 16 OS=Homo sapiens GN=KRT16 PE=1 SV=4 - [K1C16_HUMAN]	36.4298	17.12	1	3	8	16	473	51.2362	5.04639
P02533	Keratin, type I cytoskeletal 14 OS=Homo sapiens GN=KRT14 PE=1 SV=4 - [K1C14_HUMAN]	36.253	21.19	1	5	10	20	472	51.5294	5.16064
Q00577	Transcriptional activator protein Pur-alpha OS=Homo sapiens GN=PURA PE=1 SV=2 - [PURA_HUMAN]	34.3065	26.09	1	6	6	12	322	34.8894	6.44287
F5H8K9	Keratin, type II cytoskeletal 4 OS=Homo sapiens GN=KRT4 PE=1 SV=1 - [F5H8K9_HUMAN]	31.8437	8.8	2	2	5	13	500	53.9322	5.92236
P20042	Eukaryotic translation initiation factor 2 subunit 2 OS=Homo sapiens GN=EIF2S2 PE=1 SV=2 - [IF2B_HUMAN]	29.2848	21.62	1	8	8	15	333	38.3644	5.79541
Q99733	Nucleosome assembly protein 1-like 4 OS=Homo sapiens GN=NAP1L4 PE=1 SV=1 - [NP1L4_HUMAN]	24.6504	17.6	1	6	6	9	375	42.7969	4.69092
Q9C0C9	E2/E3 hybrid ubiquitin-protein ligase UBE2O OS=Homo sapiens GN=UBE2O PE=1 SV=3 - [UBE2O_HUMAN]	23.1152	9.67	1	9	9	11	1292	141.205	5.12256
Q15323	Keratin, type I cuticular Ha1 OS=Homo sapiens GN=KRT31 PE=2 SV=3 - [K1H1_HUMAN]	20.063	18.27	1	2	7	8	416	47.2071	4.88135
P81605	Dermcidin OS=Homo sapiens GN=DCD PE=1 SV=2 - [DCD_HUMAN]	19.555	35.45	1	3	3	7	110	11.2768	6.53662
E7EQB2	Kaliocin-1 (Fragment) OS=Homo sapiens GN=LTF PE=1 SV=1 - [E7EQB2_HUMAN]	19.3195	15.8	3	8	8	8	696	76.5769	8.01611
H0Y8D1	Trypsin-1 (Fragment) OS=Homo sapiens GN=PRSS1 PE=3 SV=1 - [H0Y8D1_HUMAN]	19.1812	21.13	3	2	2	12	142	15.4118	7.26904
Q9UI10	Translation initiation factor eIF-2B subunit delta OS=Homo sapiens GN=EIF2B4 PE=1 SV=2 - [EI2BD_HUMAN]	18.2275	13.19	2	4	4	7	523	57.5213	9.37842
Q14525	Keratin, type I cuticular Ha3-II OS=Homo sapiens GN=KRT33B PE=2 SV=3 - [KT33B_HUMAN]	17.8564	18.07	1	2	7	8	404	46.1845	4.84326
P63104	14-3-3 protein zeta/delta OS=Homo sapiens GN=YWHAZ PE=1 SV=1 - [1433Z_HUMAN]	17.0805	15.92	2	1	4	9	245	27.7277	4.79248
P78386	Keratin, type II cuticular Hb5 OS=Homo sapiens GN=KRT85 PE=1 SV=1 - [KRT85_HUMAN]	16.7169	15.38	1	4	7	10	507	55.7665	6.55127
P31946	14-3-3 protein beta/alpha OS=Homo sapiens GN=YWHAB PE=1 SV=3 - [1433B_HUMAN]	16.2244	19.11	1	1	5	13	246	28.0648	4.83057
Q8N1N4	Keratin, type II cytoskeletal 78 OS=Homo sapiens GN=KRT78 PE=2 SV=2 - [K2C78_HUMAN]	16.1284	12.69	1	4	7	9	520	56.8305	6.02393
P27348	14-3-3 protein theta OS=Homo sapiens GN=YWHAQ PE=1 SV=1 - [1433T_HUMAN]	15.8694	24.08	1	2	6	13	245	27.7468	4.77979
O43790	Keratin, type II cuticular Hb6 OS=Homo sapiens GN=KRT86 PE=1 SV=1 - [KRT86_HUMAN]	15.6888	15.23	3	4	7	11	486	53.4663	5.65576
Q9UJC5	SH3 domain-binding glutamic acid-rich-like protein 2 OS=Homo sapiens GN=SH3BGRL2 PE=1 SV=2 - [SH3L2_HUMAN]	15.2474	36.45	1	3	3	5	107	12.3182	6.7124
P32121	Beta-arrestin-2 OS=Homo sapiens GN=ARRB2 PE=1 SV=2 - [ARRB2_HUMAN]	14.9558	27.87	1	8	8	9	409	46.0768	7.69385
Q02413	Desmoglein-1 OS=Homo sapiens GN=DSG1 PE=1 SV=2 - [DSG1_HUMAN]	14.7505	12.96	1	9	9	9	1049	113.676	5.03369
E7EU96	Casein kinase II subunit alpha OS=Homo sapiens GN=CSNK2A1 PE=1 SV=1 - [E7EU96_HUMAN]	14.7279	17.4	3	5	5	6	385	45.2819	7.94287
Q9UEY8	Gamma-adducin OS=Homo sapiens GN=ADD3 PE=1 SV=1 - [ADDG_HUMAN]	13.896	8.92	1	5	6	7	706	79.1052	6.31592
G3V1N2	HCG1745306, isoform CRA_a OS=Homo sapiens GN=HBA2 PE=1 SV=1 - [G3V1N2_HUMAN]	13.7141	33.64	2	3	3	5	110	11.9402	8.76318
P04921	Glycophorin-C OS=Homo sapiens GN=GYPC PE=1 SV=1 - [GLPC_HUMAN]	13.5318	21.09	1	2	2	3	128	13.8017	4.84326
O95782	AP-2 complex subunit alpha-1 OS=Homo sapiens GN=AP2A1 PE=1 SV=3 - [AP2A1_HUMAN]	13.5031	8.5	1	7	7	7	977	107.478	7.03467
O14744	Protein arginine N-methyltransferase 5 OS=Homo sapiens GN=PRMT5 PE=1 SV=4 - [ANM5_HUMAN]	12.9059	9.11	1	6	6	7	637	72.6376	6.29053
K7EJT8	AP-2 complex subunit beta OS=Homo sapiens GN=AP2B1 PE=1 SV=1 - [K7EJT8_HUMAN]	12.613	11.39	2	9	9	11	913	101.268	5.2876
P11021	78 kDa glucose-regulated protein OS=Homo sapiens GN=HSPA5 PE=1 SV=2 - [GRP78_HUMAN]	12.6115	7.65	1	2	4	6	654	72.2884	5.16064
P23276	Kell blood group glycoprotein OS=Homo sapiens GN=KEL PE=1 SV=2 - [KELL_HUMAN]	12.4068	10.79	1	6	6	9	732	82.7709	7.89893
P01857	Ig gamma-1 chain C region OS=Homo sapiens GN=IGHG1 PE=1 SV=1 - [IGHG1_HUMAN]	12.2422	22.42	1	5	5	6	330	36.0832	8.19189
P41218	Myeloid cell nuclear differentiation antigen OS=Homo sapiens GN=MNDA PE=1 SV=1 - [MNDA_HUMAN]	11.5829	11.06	1	4	4	8	407	45.8072	9.75928
P15924	Desmoplakin OS=Homo sapiens GN=DSP PE=1 SV=3 - [DESP_HUMAN]	11.42	3.9	1	10	10	10	2871	331.569	6.81494
P57772	Selenocysteine-specific elongation factor OS=Homo sapiens GN=EEFSEC PE=1 SV=4 - [SELB_HUMAN]	10.0092	13.26	1	6	6	6	596	65.2631	8.35303
P12273	Prolactin-inducible protein OS=Homo sapiens GN=PIP PE=1 SV=1 - [PIP_HUMAN]	9.85512	36.99	1	4	4	5	146	16.5618	8.04541
H0YHC3	Nucleosome assembly protein 1-like 1 (Fragment) OS=Homo sapiens GN=NAP1L1 PE=1 SV=1 - [H0YHC3_HUMAN]	9.55857	14.14	13	2	2	4	198	23.4028	4.80518
J3QSA3	Ubiquitin (Fragment) OS=Homo sapiens GN=UBB PE=4 SV=1 - [J3QSA3_HUMAN]	9.38057	67.44	22	2	2	8	43	4.85061	5.18604
B5MCP9	40S ribosomal protein S7 OS=Homo sapiens GN=RPS7 PE=1 SV=1 - [B5MCP9_HUMAN]	9.37203	26.74	2	4	4	6	187	21.2988	10.272
Q9BQA1	Methylosome protein 50 OS=Homo sapiens GN=WDR77 PE=1 SV=1 - [MEP50_HUMAN]	9.23109	9.06	1	3	3	4	342	36.7011	5.17334
P11166	Solute carrier family 2, facilitated glucose transporter member 1 OS=Homo sapiens GN=SLC2A1 PE=1 SV=2 - [GTR1_HUMAN]	9.0323	10.37	1	4	4	5	492	54.0485	8.71924
P14923	Junction plakoglobin OS=Homo sapiens GN=JUP PE=1 SV=3 - [PLAK_HUMAN]	8.96203	7.79	1	5	5	6	745	81.6927	6.13818
Q13144	Translation initiation factor eIF-2B subunit epsilon OS=Homo sapiens GN=EIF2B5 PE=1 SV=3 - [EI2BE_HUMAN]	8.48788	7.21	2	4	4	5	721	80.3293	5.08447
Q86YZ3	Hornerin OS=Homo sapiens GN=HRNR PE=1 SV=2 - [HORN_HUMAN]	8.15631	6.32	1	5	5	5	2850	282.228	10.0376
Q02094	Ammonium transporter Rh type A OS=Homo sapiens GN=RHAG PE=1 SV=2 - [RHAG_HUMAN]	7.84883	7.09	1	2	2	3	409	44.1687	6.84424
P04406	Glyceraldehyde-3-phosphate dehydrogenase OS=Homo sapiens GN=GAPDH PE=1 SV=3 - [G3P_HUMAN]	6.99844	20	2	4	4	4	335	36.0304	8.45557
P0C7P3	Schlafen family member 14 OS=Homo sapiens GN=SLFN14 PE=2 SV=2 - [SLN14_HUMAN]	6.88853	4.82	1	4	4	4	912	103.84	8.23584
F5GY66	Keratin, type II cytoskeletal 1b OS=Homo sapiens GN=KRT77 PE=3 SV=1 - [F5GY66_HUMAN]	6.49034	11.01	2	3	5	5	345	37.5986	5.24951
P05164	Myeloperoxidase OS=Homo sapiens GN=MPO PE=1 SV=1 - [PERM_HUMAN]	6.32843	4.56	1	3	3	5	745	83.8148	8.96826
Q96CW1	AP-2 complex subunit mu OS=Homo sapiens GN=AP2M1 PE=1 SV=2 - [AP2M1_HUMAN]	6.2485	7.36	2	4	4	7	435	49.623	9.53955
Q5T749	Keratinocyte proline-rich protein OS=Homo sapiens GN=KPRP PE=1 SV=1 - [KPRP_HUMAN]	6.20247	7.94	1	3	3	4	579	64.0932	8.26514
J3KMX5	40S ribosomal protein S13 OS=Homo sapiens GN=RPS13 PE=1 SV=1 - [J3KMX5_HUMAN]	6.17235	14.86	2	2	2	3	148	16.7223	10.5063
F8VUA6	60S ribosomal protein L18 (Fragment) OS=Homo sapiens GN=RPL18 PE=1 SV=1 - [F8VUA6_HUMAN]	6.11291	20	5	2	2	2	130	14.5201	11.7515
H0Y580	Translation initiation factor eIF-2B subunit gamma (Fragment) OS=Homo sapiens GN=EIF2B3 PE=1 SV=1 - [H0Y580_HUMAN]	5.78253	17.57	2	3	3	4	222	24.9368	8.104
P62701	40S ribosomal protein S4, X isoform OS=Homo sapiens GN=RPS4X PE=1 SV=2 - [RS4X_HUMAN]	5.65431	9.89	1	3	3	5	263	29.5791	10.1548
Q5T4S7	E3 ubiquitin-protein ligase UBR4 OS=Homo sapiens GN=UBR4 PE=1 SV=1 - [UBR4_HUMAN]	5.47691	2.43	1	12	12	13	5183	573.476	6.03662
H0YN73	40S ribosomal protein S17 (Fragment) OS=Homo sapiens GN=RPS17L PE=1 SV=1 - [H0YN73_HUMAN]	5.43916	35.59	4	3	3	4	59	6.86169	10.0815
O95373	Importin-7 OS=Homo sapiens GN=IPO7 PE=1 SV=1 - [IPO7_HUMAN]	5.39103	2.6	1	2	2	2	1038	119.44	4.81787
P27797	Calreticulin OS=Homo sapiens GN=CALR PE=1 SV=1 - [CALR_HUMAN]	5.17038	7.43	1	3	3	3	417	48.1118	4.43701
P29508	Serpin B3 OS=Homo sapiens GN=SERPINB3 PE=1 SV=2 - [SPB3_HUMAN]	5.16346	5.9	1	2	2	2	390	44.5365	6.81494
Q5D862	Filaggrin-2 OS=Homo sapiens GN=FLG2 PE=1 SV=1 - [FILA2_HUMAN]	5.13361	1.38	1	3	3	4	2391	247.928	8.30908
P32119	Peroxiredoxin-2 OS=Homo sapiens GN=PRDX2 PE=1 SV=5 - [PRDX2_HUMAN]	5.1322	22.73	1	5	5	5	198	21.8782	5.97314
Q4KMP7	TBC1 domain family member 10B OS=Homo sapiens GN=TBC1D10B PE=1 SV=3 - [TB10B_HUMAN]	5.08521	5.69	1	3	3	3	808	87.1447	9.18799
J3QSB4	60S ribosomal protein L13 (Fragment) OS=Homo sapiens GN=RPL13 PE=1 SV=1 - [J3QSB4_HUMAN]	4.88144	15.08	2	2	2	2	126	14.6833	12.1177
O60814	Histone H2B type 1-K OS=Homo sapiens GN=HIST1H2BK PE=1 SV=3 - [H2B1K_HUMAN]	4.77717	24.6	16	3	3	3	126	13.8816	10.3159
M0R210	40S ribosomal protein S16 OS=Homo sapiens GN=RPS16 PE=1 SV=1 - [M0R210_HUMAN]	4.62975	16.28	2	2	2	3	129	14.41	10.228
H0YMM1	Annexin (Fragment) OS=Homo sapiens GN=ANXA2 PE=1 SV=1 - [H0YMM1_HUMAN]	4.60037	26.85	6	3	3	3	149	16.4485	5.90967
Q8NE71	ATP-binding cassette sub-family F member 1 OS=Homo sapiens GN=ABCF1 PE=1 SV=2 - [ABCF1_HUMAN]	4.50609	4.5	1	3	3	4	845	95.8665	6.80029
D6REM4	Casein kinase I isoform alpha OS=Homo sapiens GN=CSNK1A1 PE=1 SV=1 - [D6REM4_HUMAN]	4.49292	13.56	2	3	3	3	236	27.723	9.43701
P46781	40S ribosomal protein S9 OS=Homo sapiens GN=RPS9 PE=1 SV=3 - [RS9_HUMAN]	4.07218	10.31	1	2	2	2	194	22.5776	10.6528
E9PMI6	Methylosome subunit pICln OS=Homo sapiens GN=CLNS1A PE=1 SV=1 - [E9PMI6_HUMAN]	4.06562	14.97	4	2	2	2	167	18.2477	4.41162
F8VPE8	60S acidic ribosomal protein P0 (Fragment) OS=Homo sapiens GN=RPLP0 PE=1 SV=1 - [F8VPE8_HUMAN]	4.05108	20.92	6	3	3	3	153	16.6698	9.33447
E9PQ96	40S ribosomal protein S3 OS=Homo sapiens GN=RPS3 PE=1 SV=1 - [E9PQ96_HUMAN]	4.03515	18.68	9	2	2	3	91	10.2725	9.61279
P62851	40S ribosomal protein S25 OS=Homo sapiens GN=RPS25 PE=1 SV=1 - [RS25_HUMAN]	4.02003	16	1	2	2	2	125	13.7337	10.1108
P62269	40S ribosomal protein S18 OS=Homo sapiens GN=RPS18 PE=1 SV=3 - [RS18_HUMAN]	3.9389	11.84	1	2	2	2	152	17.7079	10.9897
Q8IY17	Neuropathy target esterase OS=Homo sapiens GN=PNPLA6 PE=1 SV=2 - [PLPL6_HUMAN]	3.9159	4.03	1	4	4	5	1366	149.9	7.81104
P22531	Small proline-rich protein 2E OS=Homo sapiens GN=SPRR2E PE=2 SV=2 - [SPR2E_HUMAN]	3.80766	43.06	5	2	2	3	72	7.84959	8.30908
M0R0P7	60S ribosomal protein L18a OS=Homo sapiens GN=RPL18A PE=1 SV=1 - [M0R0P7_HUMAN]	3.76672	16.06	5	2	2	2	137	16.1665	10.6675
P39019	40S ribosomal protein S19 OS=Homo sapiens GN=RPS19 PE=1 SV=2 - [RS19_HUMAN]	3.61749	13.79	5	3	3	3	145	16.0505	10.3159
P01834	Ig kappa chain C region OS=Homo sapiens GN=IGKC PE=1 SV=1 - [IGKC_HUMAN]	3.15308	33.96	1	2	2	4	106	11.6017	5.87158
H0YGG4	Translation initiation factor eIF-2B subunit alpha (Fragment) OS=Homo sapiens GN=EIF2B1 PE=1 SV=1 - [H0YGG4_HUMAN]	3.10397	13.82	3	2	2	2	152	16.9155	6.90283
K7EMA7	60S ribosomal protein L23a OS=Homo sapiens GN=RPL23A PE=1 SV=1 - [K7EMA7_HUMAN]	2.51778	34.29	6	2	2	2	70	7.91839	9.23193
O95810	Serum deprivation-response protein OS=Homo sapiens GN=SDPR PE=1 SV=3 - [SDPR_HUMAN]	2.5046	8.24	1	3	3	4	425	47.1446	5.21143
B7Z2F4	T-complex protein 1 subunit delta OS=Homo sapiens GN=CCT4 PE=1 SV=1 - [B7Z2F4_HUMAN]	2.43893	5.4	3	2	2	2	389	42.2726	7.60596
Q96P70	Importin-9 OS=Homo sapiens GN=IPO9 PE=1 SV=3 - [IPO9_HUMAN]	2.42705	2.79	1	2	2	2	1041	115.889	4.80518
E9PKZ0	60S ribosomal protein L8 (Fragment) OS=Homo sapiens GN=RPL8 PE=1 SV=1 - [E9PKZ0_HUMAN]	2.29622	12.68	4	3	3	3	205	22.3752	10.7554
P0CG05	Ig lambda-2 chain C regions OS=Homo sapiens GN=IGLC2 PE=1 SV=1 - [LAC2_HUMAN]	2.18229	23.58	2	2	2	2	106	11.2865	7.23975
Q5T7N0	60S ribosomal protein L5 (Fragment) OS=Homo sapiens GN=RPL5 PE=1 SV=2 - [Q5T7N0_HUMAN]	2.17823	21.54	2	2	2	2	130	14.1052	7.78174
E7EQV9	Ribosomal protein L15 (Fragment) OS=Homo sapiens GN=RPL15 PE=1 SV=1 - [E7EQV9_HUMAN]	2.15929	12.07	2	2	2	2	174	20.4971	11.2827
E7EQR4	Ezrin OS=Homo sapiens GN=EZR PE=1 SV=2 - [E7EQR4_HUMAN]	2.05477	2.89	4	2	2	3	554	65.5386	5.90967
P51811	Membrane transport protein XK OS=Homo sapiens GN=XK PE=1 SV=5 - [XK_HUMAN]	1.9885	6.53	1	2	2	2	444	50.8686	8.25049
O14523	C2 domain-containing protein 2-like OS=Homo sapiens GN=C2CD2L PE=1 SV=3 - [C2C2L_HUMAN]	1.94554	2.83	1	2	2	2	706	76.1343	7.69385
Q02878	60S ribosomal protein L6 OS=Homo sapiens GN=RPL6 PE=1 SV=3 - [RL6_HUMAN]	1.94543	11.11	1	2	2	3	288	32.7076	10.5796
P37108	Signal recognition particle 14 kDa protein OS=Homo sapiens GN=SRP14 PE=1 SV=2 - [SRP14_HUMAN]	1.9019	13.24	1	2	2	3	136	14.5608	10.0376
H0Y9Q7	Calnexin (Fragment) OS=Homo sapiens GN=CANX PE=1 SV=1 - [H0Y9Q7_HUMAN]	1.8881	12.94	2	2	2	2	170	18.8175	6.91748
D6RG13	40S ribosomal protein S3a (Fragment) OS=Homo sapiens GN=RPS3A PE=1 SV=1 - [D6RG13_HUMAN]	1.83227	13.45	8	3	3	3	223	25.5914	9.65674
P31944	Caspase-14 OS=Homo sapiens GN=CASP14 PE=1 SV=2 - [CASPE_HUMAN]	1.80812	7.02	1	2	2	4	242	27.662	5.57959
P23284	Peptidyl-prolyl cis-trans isomerase B OS=Homo sapiens GN=PPIB PE=1 SV=2 - [PPIB_HUMAN]	1.76077	6.48	1	2	2	2	216	23.7275	9.40771
Q16531	DNA damage-binding protein 1 OS=Homo sapiens GN=DDB1 PE=1 SV=1 - [DDB1_HUMAN]	1.64526	1.4	1	2	2	2	1140	126.887	5.26221
P05455	Lupus La protein OS=Homo sapiens GN=SSB PE=1 SV=2 - [LA_HUMAN]	1.64197	7.84	1	3	3	3	408	46.8082	7.12256
Q3YEC7	Rab-like protein 6 OS=Homo sapiens GN=RABL6 PE=1 SV=2 - [RABL6_HUMAN]	1.63523	2.33	1	2	2	2	729	79.4996	5.22412
