# Supplementary material for: Polyvinylalcohol-carbazate (PVAC) reduces red blood cell hemolysis
Source: PLoS One. 2019 Dec 6;14(12):e0225777. doi: 10.1371/journal.pone.0225777 (PMC6897416; doi:10.1371/journal.pone.0225777)
Supplement: S4 File — (XLSX) [file pone.0225777.s010.xlsx]

## Sheet: Sheet1
Accession	Description	Score	Coverage	# Proteins	# Unique Peptides	# Peptides	# PSMs	# AAs	MW [kDa]	calc. pI
P11277	Spectrin beta chain, erythrocytic OS=Homo sapiens GN=SPTB PE=1 SV=5 - [SPTB1_HUMAN]	1786.64	72.25	1	160	160	675	2137	246.316	5.2749
P02549	Spectrin alpha chain, erythrocytic 1 OS=Homo sapiens GN=SPTA1 PE=1 SV=5 - [SPTA1_HUMAN]	1684.81	67.42	1	183	183	698	2419	279.842	5.04639
P16157	Ankyrin-1 OS=Homo sapiens GN=ANK1 PE=1 SV=3 - [ANK1_HUMAN]	1086.39	55.82	1	83	83	396	1881	206.137	6.01123
P04264	Keratin, type II cytoskeletal 1 OS=Homo sapiens GN=KRT1 PE=1 SV=6 - [K2C1_HUMAN]	454.917	56.52	1	41	46	207	644	65.999	8.11865
P11171	Protein 4.1 OS=Homo sapiens GN=EPB41 PE=1 SV=4 - [41_HUMAN]	412.017	47.22	1	40	40	195	864	96.9573	5.57959
P35908	Keratin, type II cytoskeletal 2 epidermal OS=Homo sapiens GN=KRT2 PE=1 SV=2 - [K22E_HUMAN]	408.881	67.61	1	39	51	197	639	65.3932	8.00146
P13645	Keratin, type I cytoskeletal 10 OS=Homo sapiens GN=KRT10 PE=1 SV=6 - [K1C10_HUMAN]	398.993	51.71	1	28	34	205	584	58.7917	5.21143
P02730	Band 3 anion transport protein OS=Homo sapiens GN=SLC4A1 PE=1 SV=3 - [B3AT_HUMAN]	215.559	40.4	1	27	27	102	911	101.727	5.18604
P35527	Keratin, type I cytoskeletal 9 OS=Homo sapiens GN=KRT9 PE=1 SV=3 - [K1C9_HUMAN]	187.885	50.56	1	27	28	82	623	62.0268	5.23682
P68871	Hemoglobin subunit beta OS=Homo sapiens GN=HBB PE=1 SV=2 - [HBB_HUMAN]	174.959	89.8	1	7	13	69	147	15.9883	7.28369
P02768	Serum albumin OS=Homo sapiens GN=ALB PE=1 SV=2 - [ALBU_HUMAN]	158.209	53.04	1	35	35	98	609	69.3215	6.27783
P60709	Actin, cytoplasmic 1 OS=Homo sapiens GN=ACTB PE=1 SV=1 - [ACTB_HUMAN]	150.309	64.8	2	22	22	72	375	41.7097	5.47803
P35612	Beta-adducin OS=Homo sapiens GN=ADD2 PE=1 SV=3 - [ADDB_HUMAN]	124	43.53	1	26	27	65	726	80.8034	5.92236
P13647	Keratin, type II cytoskeletal 5 OS=Homo sapiens GN=KRT5 PE=1 SV=3 - [K2C5_HUMAN]	122.625	50.34	1	23	36	77	590	62.34	7.73779
P02538	Keratin, type II cytoskeletal 6A OS=Homo sapiens GN=KRT6A PE=1 SV=3 - [K2C6A_HUMAN]	116.938	39.72	1	11	26	76	564	60.0083	8.00146
E7EV99	Alpha-adducin OS=Homo sapiens GN=ADD1 PE=1 SV=1 - [E7EV99_HUMAN]	108.027	50.79	4	24	25	57	632	70.0124	6.45557
P02533	Keratin, type I cytoskeletal 14 OS=Homo sapiens GN=KRT14 PE=1 SV=4 - [K1C14_HUMAN]	105.232	41.74	1	4	19	68	472	51.5294	5.16064
P08779	Keratin, type I cytoskeletal 16 OS=Homo sapiens GN=KRT16 PE=1 SV=4 - [K1C16_HUMAN]	99.2167	33.19	1	6	18	62	473	51.2362	5.04639
Q5VU59	Uncharacterized protein OS=Homo sapiens GN=TPM3 PE=1 SV=1 - [Q5VU59_HUMAN]	95.2788	66.38	1	7	26	48	232	27.1578	4.79248
K7ERE3	Keratin, type I cytoskeletal 13 OS=Homo sapiens GN=KRT13 PE=1 SV=1 - [K7ERE3_HUMAN]	95.2763	27.47	2	8	14	63	415	45.2322	4.80518
P16452	Erythrocyte membrane protein band 4.2 OS=Homo sapiens GN=EPB42 PE=1 SV=3 - [EPB42_HUMAN]	83.5639	35.75	1	26	26	47	691	76.9607	8.08936
Q7Z794	Keratin, type II cytoskeletal 1b OS=Homo sapiens GN=KRT77 PE=2 SV=3 - [K2C1B_HUMAN]	82.9481	26.12	1	12	16	44	578	61.8635	5.98584
Q08495	Dematin OS=Homo sapiens GN=DMTN PE=1 SV=3 - [DEMA_HUMAN]	82.2462	44.2	1	15	15	42	405	45.4862	8.88037
J3KN67	Tropomyosin alpha-3 chain OS=Homo sapiens GN=TPM3 PE=1 SV=1 - [J3KN67_HUMAN]	80.2677	54.39	1	1	22	41	285	33.2018	4.76709
P02042	Hemoglobin subunit delta OS=Homo sapiens GN=HBD PE=1 SV=2 - [HBD_HUMAN]	79.329	48.3	1	2	8	33	147	16.0453	8.04541
Q04695	Keratin, type I cytoskeletal 17 OS=Homo sapiens GN=KRT17 PE=1 SV=2 - [K1C17_HUMAN]	78.5814	23.15	1	3	12	55	432	48.076	5.021
P69905	Hemoglobin subunit alpha OS=Homo sapiens GN=HBA1 PE=1 SV=2 - [HBA_HUMAN]	75.5956	63.38	1	7	7	34	142	15.2479	8.67529
E7EQB2	Kaliocin-1 (Fragment) OS=Homo sapiens GN=LTF PE=1 SV=1 - [E7EQB2_HUMAN]	67.6112	52.3	3	29	29	40	696	76.5769	8.01611
F5H8K9	Keratin, type II cytoskeletal 4 OS=Homo sapiens GN=KRT4 PE=1 SV=1 - [F5H8K9_HUMAN]	55.1444	9	2	1	5	27	500	53.9322	5.92236
P02776	Platelet factor 4 OS=Homo sapiens GN=PF4 PE=1 SV=2 - [PLF4_HUMAN]	53.8003	36.63	1	5	5	17	101	10.8379	8.6167
P11142	Heat shock cognate 71 kDa protein OS=Homo sapiens GN=HSPA8 PE=1 SV=1 - [HSP7C_HUMAN]	53.6001	29.72	1	15	18	29	646	70.8542	5.51611
P28289	Tropomodulin-1 OS=Homo sapiens GN=TMOD1 PE=1 SV=1 - [TMOD1_HUMAN]	53.1045	62.12	1	20	20	34	359	40.5439	5.09717
H7BYY1	Tropomyosin 1 (Alpha), isoform CRA_m OS=Homo sapiens GN=TPM1 PE=1 SV=1 - [H7BYY1_HUMAN]	51.7399	45.97	3	11	18	32	248	28.7296	4.81787
B4DGX2	Phosphatidylinositol 5-phosphate 4-kinase type-2 alpha OS=Homo sapiens GN=PIP4K2A PE=1 SV=1 - [B4DGX2_HUMAN]	21.7841	23.63	2	7	7	11	347	39.777	6.21436
Q8N1N4	Keratin, type II cytoskeletal 78 OS=Homo sapiens GN=KRT78 PE=2 SV=2 - [K2C78_HUMAN]	21.1429	27.88	1	11	14	16	520	56.8305	6.02393
Q6KB66	Keratin, type II cytoskeletal 80 OS=Homo sapiens GN=KRT80 PE=1 SV=2 - [K2C80_HUMAN]	20.8363	16.15	1	5	6	10	452	50.4938	5.66846
X6R4N5	Erythroid membrane-associated protein OS=Homo sapiens GN=ERMAP PE=4 SV=1 - [X6R4N5_HUMAN]	19.206	22.08	2	6	6	11	385	42.8006	8.70459
P08107	Heat shock 70 kDa protein 1A/1B OS=Homo sapiens GN=HSPA1A PE=1 SV=5 - [HSP71_HUMAN]	17.6367	18.72	1	7	10	13	641	70.009	5.65576
Q14CN4	Keratin, type II cytoskeletal 72 OS=Homo sapiens GN=KRT72 PE=1 SV=2 - [K2C72_HUMAN]	16.9932	8.41	1	2	5	13	511	55.8424	6.88818
H0Y8D1	Trypsin-1 (Fragment) OS=Homo sapiens GN=PRSS1 PE=3 SV=1 - [H0Y8D1_HUMAN]	16.679	21.13	3	2	2	14	142	15.4118	7.26904
P81605	Dermcidin OS=Homo sapiens GN=DCD PE=1 SV=2 - [DCD_HUMAN]	15.9721	22.73	1	3	3	8	110	11.2768	6.53662
P62805	Histone H4 OS=Homo sapiens GN=HIST1H4A PE=1 SV=2 - [H4_HUMAN]	13.1998	51.46	1	5	5	6	103	11.3604	11.356
Q00577	Transcriptional activator protein Pur-alpha OS=Homo sapiens GN=PURA PE=1 SV=2 - [PURA_HUMAN]	13.1295	23.91	1	5	5	7	322	34.8894	6.44287
P04406	Glyceraldehyde-3-phosphate dehydrogenase OS=Homo sapiens GN=GAPDH PE=1 SV=3 - [G3P_HUMAN]	13.0065	18.21	1	5	5	9	335	36.0304	8.45557
Q02413	Desmoglein-1 OS=Homo sapiens GN=DSG1 PE=1 SV=2 - [DSG1_HUMAN]	11.8583	12.39	1	9	9	9	1049	113.676	5.03369
E5RHP7	Carbonic anhydrase 1 (Fragment) OS=Homo sapiens GN=CA1 PE=1 SV=1 - [E5RHP7_HUMAN]	11.5909	26.69	2	5	5	7	251	27.7367	6.59521
P05164	Myeloperoxidase OS=Homo sapiens GN=MPO PE=1 SV=1 - [PERM_HUMAN]	9.86324	7.92	1	5	5	5	745	83.8148	8.96826
P61981	14-3-3 protein gamma OS=Homo sapiens GN=YWHAG PE=1 SV=2 - [1433G_HUMAN]	8.65504	15.79	1	1	4	6	247	28.2849	4.89404
P31946	14-3-3 protein beta/alpha OS=Homo sapiens GN=YWHAB PE=1 SV=3 - [1433B_HUMAN]	8.31674	20.33	1	2	5	7	246	28.0648	4.83057
P12273	Prolactin-inducible protein OS=Homo sapiens GN=PIP PE=1 SV=1 - [PIP_HUMAN]	8.16828	43.84	1	5	5	5	146	16.5618	8.04541
Q5T749	Keratinocyte proline-rich protein OS=Homo sapiens GN=KPRP PE=1 SV=1 - [KPRP_HUMAN]	8.16094	19.52	1	7	7	7	579	64.0932	8.26514
P41218	Myeloid cell nuclear differentiation antigen OS=Homo sapiens GN=MNDA PE=1 SV=1 - [MNDA_HUMAN]	8.00027	13.76	1	5	5	5	407	45.8072	9.75928
H0YMM1	Annexin (Fragment) OS=Homo sapiens GN=ANXA2 PE=1 SV=1 - [H0YMM1_HUMAN]	7.96956	29.53	6	4	4	5	149	16.4485	5.90967
Q5D862	Filaggrin-2 OS=Homo sapiens GN=FLG2 PE=1 SV=1 - [FILA2_HUMAN]	7.37828	1.76	1	3	3	5	2391	247.928	8.30908
P01857	Ig gamma-1 chain C region OS=Homo sapiens GN=IGHG1 PE=1 SV=1 - [IGHG1_HUMAN]	7.1648	23.64	1	5	5	7	330	36.0832	8.19189
P01834	Ig kappa chain C region OS=Homo sapiens GN=IGKC PE=1 SV=1 - [IGKC_HUMAN]	5.67568	51.89	1	3	3	5	106	11.6017	5.87158
P06899	Histone H2B type 1-J OS=Homo sapiens GN=HIST1H2BJ PE=1 SV=3 - [H2B1J_HUMAN]	5.37492	31.75	5	1	4	7	126	13.8956	10.3159
O60814	Histone H2B type 1-K OS=Homo sapiens GN=HIST1H2BK PE=1 SV=3 - [H2B1K_HUMAN]	5.37492	31.75	11	1	4	7	126	13.8816	10.3159
P02787	Serotransferrin OS=Homo sapiens GN=TF PE=1 SV=3 - [TRFE_HUMAN]	5.16443	10.32	2	6	6	6	698	77.0136	7.12256
P08311	Cathepsin G OS=Homo sapiens GN=CTSG PE=1 SV=2 - [CATG_HUMAN]	5.14325	14.12	1	3	3	4	255	28.8191	11.1948
Q00013	55 kDa erythrocyte membrane protein OS=Homo sapiens GN=MPP1 PE=1 SV=2 - [EM55_HUMAN]	4.96683	9.87	1	4	4	4	466	52.2636	7.37158
P0CW22	40S ribosomal protein S17-like OS=Homo sapiens GN=RPS17L PE=1 SV=1 - [RS17L_HUMAN]	4.56653	16.3	4	3	3	4	135	15.5404	9.84717
P62244	40S ribosomal protein S15a OS=Homo sapiens GN=RPS15A PE=1 SV=2 - [RS15A_HUMAN]	4.53431	22.31	1	3	3	3	130	14.83	10.1255
J3QSA3	Ubiquitin (Fragment) OS=Homo sapiens GN=UBB PE=4 SV=1 - [J3QSA3_HUMAN]	4.35542	67.44	22	2	2	4	43	4.85061	5.18604
P25311	Zinc-alpha-2-glycoprotein OS=Homo sapiens GN=AZGP1 PE=1 SV=2 - [ZA2G_HUMAN]	4.33221	11.41	1	3	3	3	298	34.2371	6.04932
Q9C0C9	E2/E3 hybrid ubiquitin-protein ligase UBE2O OS=Homo sapiens GN=UBE2O PE=1 SV=3 - [UBE2O_HUMAN]	4.08645	3.33	1	3	3	3	1292	141.205	5.12256
P15924	Desmoplakin OS=Homo sapiens GN=DSP PE=1 SV=3 - [DESP_HUMAN]	4.00873	1.71	1	6	6	6	2871	331.569	6.81494
P42357	Histidine ammonia-lyase OS=Homo sapiens GN=HAL PE=1 SV=1 - [HUTH_HUMAN]	4.00655	3.96	1	3	3	3	657	72.6518	6.94678
K7EMV3	Histone H3 OS=Homo sapiens GN=H3F3B PE=1 SV=1 - [K7EMV3_HUMAN]	3.78596	15.22	8	2	2	3	92	10.3278	11.8247
Q96P63	Serpin B12 OS=Homo sapiens GN=SERPINB12 PE=1 SV=1 - [SPB12_HUMAN]	3.72565	8.4	2	4	4	4	405	46.2471	5.52881
J3KRG2	Gasdermin-A (Fragment) OS=Homo sapiens GN=GSDMA PE=1 SV=2 - [J3KRG2_HUMAN]	3.66524	14.56	2	2	2	2	158	17.7801	6.02393
H7C1V0	Cathepsin D light chain (Fragment) OS=Homo sapiens GN=CTSD PE=1 SV=1 - [H7C1V0_HUMAN]	3.65717	9.52	2	2	2	2	189	20.3585	8.44092
P14923	Junction plakoglobin OS=Homo sapiens GN=JUP PE=1 SV=3 - [PLAK_HUMAN]	3.63492	3.49	1	3	3	3	745	81.6927	6.13818
H0Y5H9	Serpin B4 (Fragment) OS=Homo sapiens GN=SERPINB4 PE=3 SV=1 - [H0Y5H9_HUMAN]	3.46847	6.47	3	3	3	3	371	42.4713	6.04932
P06702	Protein S100-A9 OS=Homo sapiens GN=S100A9 PE=1 SV=1 - [S10A9_HUMAN]	2.7214	30.7	1	3	3	4	114	13.2335	6.12549
O14744	Protein arginine N-methyltransferase 5 OS=Homo sapiens GN=PRMT5 PE=1 SV=4 - [ANM5_HUMAN]	2.69953	9.58	3	6	6	6	637	72.6376	6.29053
Q08554	Desmocollin-1 OS=Homo sapiens GN=DSC1 PE=1 SV=2 - [DSC1_HUMAN]	2.63017	4.25	1	3	3	3	894	99.9238	5.42725
E7EU96	Casein kinase II subunit alpha OS=Homo sapiens GN=CSNK2A1 PE=1 SV=1 - [E7EU96_HUMAN]	2.55997	10.39	3	3	3	4	385	45.2819	7.94287
P05109	Protein S100-A8 OS=Homo sapiens GN=S100A8 PE=1 SV=1 - [S10A8_HUMAN]	2.4656	23.66	1	2	2	3	93	10.8276	7.03467
A8MUD9	60S ribosomal protein L7 OS=Homo sapiens GN=RPL7 PE=1 SV=1 - [A8MUD9_HUMAN]	2.3276	14.42	2	2	2	2	208	24.4174	10.6675
P20160	Azurocidin OS=Homo sapiens GN=AZU1 PE=1 SV=3 - [CAP7_HUMAN]	2.27533	16.33	1	4	4	4	251	26.8687	9.49561
P32119	Peroxiredoxin-2 OS=Homo sapiens GN=PRDX2 PE=1 SV=5 - [PRDX2_HUMAN]	2.20388	18.18	2	3	3	3	198	21.8782	5.97314
P16403	Histone H1.2 OS=Homo sapiens GN=HIST1H1C PE=1 SV=2 - [H12_HUMAN]	2.20316	9.86	3	2	2	3	213	21.3517	10.9312
Q9UEY8	Gamma-adducin OS=Homo sapiens GN=ADD3 PE=1 SV=1 - [ADDG_HUMAN]	2.19549	6.94	1	4	4	4	706	79.1052	6.31592
P41091	Eukaryotic translation initiation factor 2 subunit 3 OS=Homo sapiens GN=EIF2S3 PE=1 SV=3 - [IF2G_HUMAN]	2.15652	10.38	1	4	4	4	472	51.0772	8.39697
C9JPQ9	Fibrinogen gamma chain (Fragment) OS=Homo sapiens GN=FGG PE=1 SV=1 - [C9JPQ9_HUMAN]	2.09624	20.17	5	2	2	2	119	13.5378	7.1958
F8W696	Truncated apolipoprotein A-I OS=Homo sapiens GN=APOA1 PE=1 SV=1 - [F8W696_HUMAN]	1.95332	10.61	2	2	2	2	245	27.8913	6.12549
P31944	Caspase-14 OS=Homo sapiens GN=CASP14 PE=1 SV=2 - [CASPE_HUMAN]	1.89099	15.7	1	4	4	4	242	27.662	5.57959
B5MCP9	40S ribosomal protein S7 OS=Homo sapiens GN=RPS7 PE=1 SV=1 - [B5MCP9_HUMAN]	1.86423	15.51	2	4	4	4	187	21.2988	10.272
P20042	Eukaryotic translation initiation factor 2 subunit 2 OS=Homo sapiens GN=EIF2S2 PE=1 SV=2 - [IF2B_HUMAN]	1.85066	11.41	1	3	3	3	333	38.3644	5.79541
Q96KK5	Histone H2A type 1-H OS=Homo sapiens GN=HIST1H2AH PE=1 SV=3 - [H2A1H_HUMAN]	1.8371	21.88	10	2	2	4	128	13.8978	10.8872
H0YLA2	Signal recognition particle 14 kDa protein OS=Homo sapiens GN=SRP14 PE=1 SV=1 - [H0YLA2_HUMAN]	1.81035	15.65	2	2	2	2	115	13.0498	9.56885
H0YEN5	40S ribosomal protein S2 (Fragment) OS=Homo sapiens GN=RPS2 PE=1 SV=1 - [H0YEN5_HUMAN]	1.77673	9.74	3	2	2	2	195	21.1404	9.83252
P68104	Elongation factor 1-alpha 1 OS=Homo sapiens GN=EEF1A1 PE=1 SV=1 - [EF1A1_HUMAN]	1.73255	7.58	3	3	3	3	462	50.1091	9.01221
F8VWS0	60S acidic ribosomal protein P0 OS=Homo sapiens GN=RPLP0 PE=1 SV=1 - [F8VWS0_HUMAN]	1.72948	15.3	2	2	2	2	281	30.4368	6.23975
P62701	40S ribosomal protein S4, X isoform OS=Homo sapiens GN=RPS4X PE=1 SV=2 - [RS4X_HUMAN]	1.66635	6.08	1	2	2	2	263	29.5791	10.1548
B5MCT8	40S ribosomal protein S9 OS=Homo sapiens GN=RPS9 PE=1 SV=1 - [B5MCT8_HUMAN]	1.63633	12.23	3	2	2	2	139	16.6174	11.063
